# Supplementary material
Source: Springer Nature journal article supplement (https://www.springermedizin.de/resource/supplementary/12968_2010_1426_MOESM1_ESM.pdf/9580106)

### 1.5T signal intensity

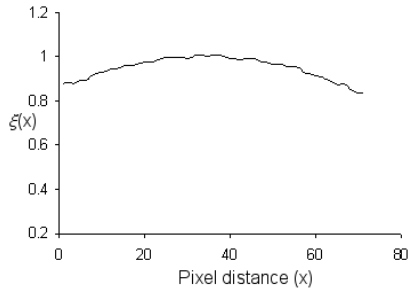

### CuSO<sub>4</sub> bottle

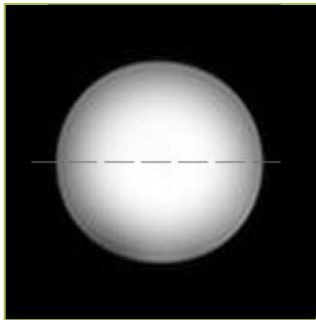

### 3.0T signal intensity

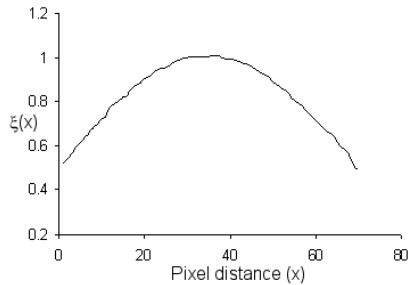

Supplement: MOESM1 [file 9580106]
